# Supplementary material for: Transmission of COVID-19 in Cities with Weather Conditions of High Air Humidity: Lessons Learned from Turkish Black Sea Region to Face Next Pandemic Crisis
Source: MDPI journal article supplement (doi:10.3390/covid3110113), 2023-10-29
Supplement: s1 [file s1]

## SUPPLEMENTARY MATERIAL

# Transmission of COVID-19 in cities with weather conditions of high air humidity: Lessons learned from Turkish Black Sea region to face next pandemic crisis

Aytac Perihan Akan<sup>1</sup> and Mario Coccia<sup>2\*</sup>

<sup>1</sup> Hacettepe University, Department of Environmental Engineering, 06800, Ankara, Turkey; [apakan@hacettepe.edu.tr](mailto:apakan@hacettepe.edu.tr); ORCID: 0000-0003-4626-4741

<sup>2</sup> CNR–National Research Council of Italy, Department of Social Sciences-IRCRES-CNR, 10135, Torino, Italy; Arizona State University-School of Complex Adaptive Systems, Tempe, AZ 85281-2701- USA; E-mail: [mario.coccia@cnr.it](mailto:mario.coccia@cnr.it); ORCID: 0000-0003-1957-6731

\* Correspondence: [mario.coccia@cnr.it](mailto:mario.coccia@cnr.it); Tel.: +39 011 3977 625

**Table SM-1** The demographic information of the provinces studied (TUIK 2021).

| Provinces | Population | Area (km <sup>2</sup> ) |
|-----------|------------|-------------------------|
| Sinop     | 216,460    | 5,718                   |
| Samsun    | 1,356,079  | 9,655                   |
| Ordu      | 761,400    | 5,861                   |
| Giresun   | 448,721    | 7,025                   |
| Trabzon   | 811,901    | 4,648                   |
| Rize      | 344,494    | 3,835                   |

**Table SM-2** Monthly COVID-19 cases per 100,000 people between February and August, 2021 for all provinces examined in the current study.

|          | Provinces                     |         |         |         |         |         |          |         |         |
|----------|-------------------------------|---------|---------|---------|---------|---------|----------|---------|---------|
|          | Sinop                         | Samsun  | Ordu    | Giresun | Trabzon | Rize    | İstanbul | Ankara  | İzmir   |
|          | Monthly Cases/100K population |         |         |         |         |         |          |         |         |
| FEBRUARY | 637.32                        | 984.76  | 1004.85 | 948.70  | 901.22  | 823.83  | 329.89   | 165.55  | 206.95  |
| MARCH    | 1239.35                       | 1895.05 | 1167.62 | 1358.60 | 984.29  | 944.12  | 1100.51  | 488.47  | 456.34  |
| APRIL    | 1601.15                       | 2189.67 | 2043.02 | 2453.87 | 1461.63 | 1946.89 | 3271.80  | 1960.54 | 1277.01 |
| MAY      | 371.24                        | 458.53  | 646.06  | 544.29  | 512.36  | 677.99  | 786.02   | 681.68  | 393.94  |
| JUNE     | 93.38                         | 149.87  | 208.81  | 160.60  | 223.81  | 343.34  | 212.90   | 349.05  | 115.71  |
| JULY     | 285.94                        | 249.75  | 463.68  | 520.60  | 516.97  | 568.87  | 430.51   | 398.32  | 139.47  |
| AUGUST   | 654.63                        | 754.03  | 926.61  | 1026.53 | 1513.57 | 2532.41 | 725.03   | 867.74  | 221.84  |

**Table SM-3** Weekly cases of COVID-19 per 100,000 people from 08<sup>th</sup> February, 2021 to 03<sup>rd</sup> September 2021 for all provinces examined in the current study.

|                 | Provinces                             |        |        |         |         |        |          |        |        |
|-----------------|---------------------------------------|--------|--------|---------|---------|--------|----------|--------|--------|
|                 | Sinop                                 | Samsun | Ordu   | Giresun | Trabzon | Rize   | İstanbul | Ankara | İzmir  |
| Population      |                                       |        |        |         |         |        |          |        |        |
|                 | COVID-19 Weekly Cases/100K population |        |        |         |         |        |          |        |        |
| 08 - 14 Feb     | 79.52                                 | 171.29 | 194.42 | 184.34  | 228.02  | 202.44 | 60.19    | 35.49  | 44.39  |
| 15 - 21 Feb     | 83.62                                 | 202.94 | 228.40 | 217.51  | 207.54  | 200.08 | 68.23    | 35.39  | 42.67  |
| 20 - 26 Feb     | 160.03                                | 262.17 | 301.76 | 264.71  | 239.52  | 213.10 | 89.90    | 39.84  | 53.42  |
| 27 Feb -05 Mar  | 314.15                                | 348.36 | 280.27 | 282.14  | 226.14  | 208.21 | 111.57   | 54.83  | 66.47  |
| 06 - 12 Mar     | 345.56                                | 458.53 | 248.62 | 296.84  | 222.32  | 188.18 | 178.25   | 68.53  | 78.57  |
| 13 - 19 Mar     | 309.06                                | 508.97 | 258.87 | 356.35  | 246.95  | 202.41 | 251.12   | 107.99 | 111.41 |
| 27 Mar-02 Apr   | 360.34                                | 678.72 | 459.94 | 503.88  | 353.49  | 404.81 | 591.45   | 272.79 | 218.88 |
| 03 - 09 Apr     | 398.69                                | 645.17 | 501.71 | 591.01  | 359.28  | 453.31 | 804.97   | 419.06 | 304.07 |
| 10 - 16 Apr     | 440.73                                | 601.14 | 565.14 | 624.22  | 409.90  | 516.03 | 920.07   | 534.14 | 351.97 |
| 17-23 Apr       | 445.35                                | 481.90 | 528.24 | 706.23  | 353.74  | 508.19 | 845.75   | 567.88 | 335.09 |
| 24 - 30 Apr     | 213.43                                | 267.54 | 316.52 | 388.44  | 237.71  | 353.70 | 532.02   | 361.52 | 223.34 |
| 01 - 07 May     | 167.24                                | 189.00 | 260.97 | 236.90  | 198.55  | 270.94 | 359.99   | 247.68 | 161.92 |
| 08 - 14 May     | 97.02                                 | 95.57  | 149.72 | 134.83  | 125.14  | 167.27 | 184.78   | 152.63 | 93.86  |
| 15 - 21 May     | 51.28                                 | 97.19  | 117.28 | 84.69   | 93.73   | 119.64 | 123.88   | 123.02 | 72.75  |
| 22 - 28 May     | 39.27                                 | 55.60  | 88.78  | 64.41   | 72.92   | 83.63  | 89.97    | 115.71 | 47.74  |
| 29 May - 04 Jun | 38.34                                 | 49.40  | 68.39  | 54.74   | 51.38   | 85.18  | 63.93    | 99.50  | 41.23  |
| 05 - 11 Jun     | 32.80                                 | 46.60  | 59.76  | 52.15   | 65.65   | 80.15  | 55.20    | 94.87  | 32.04  |
| 12 - 18 Jun     | 14.78                                 | 30.97  | 55.69  | 39.00   | 60.35   | 96.99  | 51.27    | 93.11  | 25.99  |
| 19 - 25 Jun     | 20.33                                 | 34.36  | 42.95  | 31.87   | 54.44   | 95.54  | 54.30    | 83.64  | 27.40  |
| 26 Jun - 02 Jul | 12.47                                 | 34.00  | 39.66  | 22.06   | 49.02   | 76.95  | 54.60    | 71.99  | 23.51  |
| 03 - 09 Jul     | 29.57                                 | 23.97  | 50.17  | 23.40   | 49.88   | 59.82  | 56.75    | 59.10  | 22.16  |
| 10 - 16 Jul     | 27.44                                 | 30.66  | 50.32  | 78.54   | 56.33   | 76.76  | 75.12    | 57.95  | 24.46  |
| 17 - 23 Jul     | 58.21                                 | 47.22  | 87.87  | 142.72  | 108.11  | 94.77  | 88.19    | 69.13  | 33.43  |
| 24 - 30 Jul     | 144.14                                | 112.90 | 220.25 | 230.88  | 241.78  | 243.64 | 168.82   | 165.20 | 43.30  |
| 31 Jul – 06 Aug | 161.09                                | 176.99 | 306.18 | 271.28  | 328.03  | 503.27 | 182.21   | 184.58 | 65.85  |
| 07 - 13 Aug     | 119.19                                | 171.16 | 240.08 | 279.24  | 330.58  | 575.56 | 181.96   | 199.55 | 49.81  |
| 14 - 20 Aug     | 132.59                                | 160.54 | 170.08 | 204.80  | 310.63  | 538.10 | 147.73   | 176.38 | 46.24  |
| 21 – 27 Aug     | 149.68                                | 169.16 | 158.92 | 197.90  | 366.67  | 614.18 | 148.33   | 194.96 | 43.30  |
| 28 Aug – 03 Sep | 201.42                                | 177.57 | 166.40 | 196.11  | 392.91  | 653.10 | 158.95   | 242.61 | 45.58  |

**Table SM-4** Average climate parameters in the investigated period for all provinces in Turkey examined in the current study.

|        | SAMSUN          |                   |             |                    |                       |           |                           |               |
|--------|-----------------|-------------------|-------------|--------------------|-----------------------|-----------|---------------------------|---------------|
|        | Temperature, °C | Wind Speed (kmph) | Gust (kmph) | Precipitation (mm) | Relative Humidity (%) | Cloud (%) | Atmospheric Pressure (mb) | Sun Hour (hr) |
| Feb-21 | 6               | 12.8              | 22.7        | 122.7              | 69                    | 47        | 1022.1                    | 245           |
| Mar-21 | 7               | 8.9               | 13.5        | 156.3              | 78                    | 65        | 1018.2                    | 200           |
| Apr-21 | 12              | 8.8               | 13.4        | 90                 | 80                    | 61        | 1016.6                    | 202           |
| May-21 | 17              | 7.2               | 11.2        | 98.9               | 75                    | 35        | 1014.4                    | 298           |
| Jun-21 | 20              | 7.1               | 10.7        | 64.8               | 78                    | 34        | 1014.0                    | 300           |
| Jul-21 | 25              | 11                | 16.3        | 44.0               | 71                    | 27        | 1010.7                    | 344           |
| Aug-21 | 25              | 9.5               | 14.4        | 61.7               | 70                    | 26        | 1012.1                    | 324           |
|        | SİNOP           |                   |             |                    |                       |           |                           |               |
|        | Temperature, °C | Wind Speed (kmph) | Gust (kmph) | Precipitation (mm) | Relative Humidity (%) | Cloud (%) | Atmospheric Pressure (mb) | Sun Hour (hr) |
| Feb-21 | 8               | 18.8              | 29          | 84.1               | 70                    | 52        | 1021.2                    | 215           |
| Mar-21 | 7               | 18.7              | 27.9        | 82                 | 75                    | 62        | 1017.9                    | 197           |
| Apr-21 | 10              | 20.1              | 32.6        | 102.3              | 86                    | 58        | 1016.6                    | 233           |
| May-21 | 15              | 18.7              | 32.3        | 62.7               | 80                    | 29        | 1014.2                    | 325           |
| Jun-21 | 20              | 15                | 23.1        | 39                 | 79                    | 31        | 1013.6                    | 316           |
| Jul-21 | 25              | 21                | 31.5        | 27.5               | 75                    | 20        | 1010.4                    | 354           |
| Aug-21 | 25              | 19.4              | 28.8        | 211.6              | 74                    | 23        | 1011.6                    | 317           |
|        | ORDU            |                   |             |                    |                       |           |                           |               |
|        | Temperature, °C | Wind Speed (kmph) | Gust (kmph) | Precipitation (mm) | Relative Humidity (%) | Cloud (%) | Atmospheric Pressure (mb) | Sun Hour (hr) |
| Feb-21 | 7               | 10                | 16.6        | 139.9              | 70                    | 49        | 1022.5                    | 224           |
| Mar-21 | 7               | 8.1               | 12.6        | 222.4              | 78                    | 63        | 1018.3                    | 204           |
| Apr-21 | 12              | 7.8               | 12.6        | 81.2               | 81                    | 62        | 1016.7                    | 200           |
| May-21 | 17              | 7.6               | 12.2        | 130.1              | 77                    | 36        | 1014.4                    | 292           |
| Jun-21 | 21              | 7.2               | 11.0        | 62.9               | 78                    | 38        | 1013.8                    | 278           |
| Jul-21 | 25              | 10.4              | 16.3        | 111.3              | 75                    | 38        | 1010.4                    | 300           |
| Aug-21 | 25              | 8.2               | 13.4        | 74.7               | 75                    | 35        | 1011.9                    | 328           |
|        | GİRESUN         |                   |             |                    |                       |           |                           |               |

|        | Temperature, °C | Wind Speed (kmph) | Gust (kmph) | Precipitation (mm) | Relative Humidity (%) | Cloud (%) | Atmospheric Pressure (mb) | Sun Hour (hr) |
|--------|-----------------|-------------------|-------------|--------------------|-----------------------|-----------|---------------------------|---------------|
| Feb-21 | 7               | 10.1              | 16.8        | 146.4              | 70                    | 49        | 1022.6                    | 226           |
| Mar-21 | 7               | 9.0               | 13.9        | 246.4              | 76                    | 61        | 1018.3                    | 221           |
| Apr-21 | 11              | 8.1               | 12.7        | 94.8               | 81                    | 58        | 1016.7                    | 220           |
| May-21 | 16              | 7.5               | 11.6        | 104.5              | 76                    | 38        | 1014.4                    | 292           |
| Jun-21 | 19              | 6.8               | 10.4        | 85.2               | 78                    | 42        | 1013.9                    | 278           |
| Jul-21 | 24              | 9.9               | 15.3        | 123.6              | 75                    | 40        | 1010.5                    | 300           |
| Aug-21 | 24              | 7.5               | 11.3        | 95.4               | 75                    | 38        | 1012.2                    | 328           |
|        | TRABZON         |                   |             |                    |                       |           |                           |               |
|        | Temperature, °C | Wind Speed (kmph) | Gust (kmph) | Precipitation (mm) | Relative Humidity (%) | Cloud (%) | Atmospheric Pressure (mb) | Sun Hour (hr) |
| Feb-21 | 8               | 10.6              | 17.0        | 107.6              | 68                    | 52        | 1022.8                    | 221           |
| Mar-21 | 8               | 10.8              | 15.3        | 212.2              | 74                    | 60        | 1018.5                    | 211           |
| Apr-21 | 12              | 8.8               | 13.7        | 82.0               | 81                    | 60        | 1016.8                    | 205           |
| May-21 | 17              | 8.4               | 12.9        | 66.1               | 76                    | 38        | 1014.3                    | 290           |
| Jun-21 | 20              | 7.2               | 10.4        | 46.0               | 78                    | 41        | 1013.8                    | 285           |
| Jul-21 | 24              | 8.6               | 13.0        | 88.2               | 73                    | 40        | 1010.0                    | 292           |
| Aug-21 | 24              | 6.9               | 10.3        | 72.2               | 76                    | 47        | 1011.8                    | 273           |
|        | RİZE            |                   |             |                    |                       |           |                           |               |
|        | Temperature, °C | Wind Speed (kmph) | Gust (kmph) | Precipitation (mm) | Relative Humidity (%) | Cloud (%) | Atmospheric Pressure (mb) | Sun Hour (hr) |
| Feb-21 | 8               | 7.3               | 12.4        | 179.8              | 70                    | 56        | 1023.2                    | 200           |
| Mar-21 | 7               | 8.2               | 12.4        | 303.9              | 76                    | 64        | 1013.8                    | 190           |
| Apr-21 | 13              | 7.4               | 11.4        | 85.8               | 79                    | 58        | 1016.9                    | 226           |
| May-21 | 17              | 7.0               | 10.6        | 130.7              | 73                    | 36        | 1014.3                    | 288           |
| Jun-21 | 20              | 6.6               | 9.3         | 85.8               | 78                    | 42        | 1013.7                    | 309           |
| Jul-21 | 24              | 7.3               | 10.8        | 110.9              | 75                    | 42        | 1010.2                    | 308           |
| Aug-21 | 24              | 6.2               | 9.00        | 92.6               | 79                    | 53        | 1011.9                    | 232           |
